# Supplementary material
Source: MDPI journal article supplement (https://www.mdpi.com/2673-1991/5/2/7)
Supplement: s1 [file s1]

### Supplementary Tables S1-3

**Table S1** Comparison of parent and child PedsQL scores for overall psychosocial function and each subdomain

|                    | Visit    | Child Score<br>Median (IQR) | Parent Score<br>Median (IQR) | Wilcoxon<br>signed-rank test<br>p-value |
|--------------------|----------|-----------------------------|------------------------------|-----------------------------------------|
| PSF overall score  | Baseline | 73.3 (58.3-88.3)            | 81.1 (72.2-91.9)             | 0.0259                                  |
|                    | 3m       | 88.3 (56.7-96.7)            | 81.7 (68.3-96.7)             | 0.5                                     |
|                    | 6m       | 84.2 (63.3-91.7)            | 78.3 (70.5-91.7)             | 0.6                                     |
|                    | 12m      | 86.7 (70.0-96.7)            | 81.7 (66.7-96.7)             | 0.5                                     |
| Emotional Function | Baseline | 75.0 (55.0-90.0)            | 80.0 (65.0-90.0)             | 0.3                                     |
|                    | 3m       | 90.0 (60.0-100)             | 77.5 (65.0-95.0)             | 0.2                                     |
|                    | 6m       | 77.5 (60.0-90.0)            | 75.0 (55.0-95.0)             | 0.6                                     |
|                    | 12m      | 85.0 (70.0-100)             | 77.5 (62.5-95)               | 0.3                                     |
| Social Function    | Baseline | 80.0 (65.0-100)             | 100 (75.0-100)               | 0.0541                                  |
|                    | 3m       | 100 (75.0-100)              | 97.5 (75.0-100)              | 0.5                                     |
|                    | 6m       | 90.0 (70.0-100)             | 90.0 (75.0-100)              | 0.4                                     |
|                    | 12m      | 100 (75.0-100)              | 100 (75.0-100)               | 0.2                                     |
| School Function    | Baseline | 70.0 (60.0-80.0)            | 75.0 (65.8-90.0)             | 0.0145                                  |
|                    | 3m       | 80.0 (60.0-90.0)            | 83.3 (65.0-95.0)             | 0.9                                     |
|                    | 6m       | 75.0 (60.0-80.0)            | 70.0 (65.0-90.0)             | 0.9                                     |
|                    | 12m      | 80.0 (70.0-90.0)            | 80.0 (65.0-100)              | 0.7                                     |

**Table S2** Parent and Child Comparison of PedsQL PSF scores by age group

| Psychosocial<br>Function<br>PedsQL | Child Score<br>Median (IQR) | Parent Score<br>Median (IQR) | Wilcoxon<br>signed-rank test<br>p-value |
|------------------------------------|-----------------------------|------------------------------|-----------------------------------------|
| Toddler (2-4y)                     | Not applicable              | 87.8 (76.1-96.7)             | -                                       |
| Young Child (5-7)                  | 78.3 (63.3-90)              | 81.7 (66.7-91.7)             | 0.3                                     |
| Child (8-12)                       | 88.3 (65-95)                | 81.7 (68.3-93.3)             | 0.9                                     |
| Teen (13+)                         | 86.7 (73.3-90)              | 80.83 (70-90)                | 0.8                                     |

**Table S3** Univariate analysis of IES-R scores and each potential covariate at each time-point

| Dependent Variable | Independent Variable            | Odds Ratio                                       | Standard Error  | P-Value          | 95% CI                     |
|--------------------|---------------------------------|--------------------------------------------------|-----------------|------------------|----------------------------|
| Baseline IESR      | Female                          | 1.93                                             | 0.543           | 0.019*           | 1.11, 3.33                 |
|                    | Age                             | 1.01                                             | 0.338           | 0.7              | 0.95, 1.08                 |
|                    | Metro                           | 1.77                                             | 0.640           | 0.116**          | 0.86, 3.59                 |
|                    | Parent Education                | overall test chi <sup>2</sup> 9.64(2) p=0.0081** |                 |                  |                            |
|                    | - some tertiary<br>- university | 8.87<br>16.75                                    | 6.649<br>12.159 | 0.004<br><0.0001 | 2.04, 38.54<br>1.04, 69.49 |

|          |                  |                                                 |        |         |             |
|----------|------------------|-------------------------------------------------|--------|---------|-------------|
|          | Other Language   | 0.31                                            | .0445  | 0.4     | 0.68, 2.55  |
|          | Scald            | 1.59                                            | 0.450  | 0.099** | 0.92, 2.77  |
|          | Contact          | 0.52                                            | 0.209  | 0.102** | 0.23, 1.14  |
|          | Flame            | 0.422                                           | 0.186  | 0.050*  | 0.18, 1.00  |
|          | TBSA             | 0.99                                            | 0.046  | 0.9     | 0.91, 1.09  |
|          | Predictor 1      | 0.86                                            | 0.259  | 0.6     | 0.48, 1.55  |
|          | Predictor 2      | 2.38                                            | 0.947  | 0.057** | 0.98, 5.13  |
|          | Predictor 3      | 0.92                                            | 0.331  | 0.8     | 0.46, 1.86  |
|          | Predictor 4      | 0.93                                            | 0.318  | 0.8     | 0.74, 1.82  |
| 6m IESR  | Female           | 2.49                                            | 0.938  | 0.016*  | 1.19, 5.21  |
|          | Age              | 1.02                                            | 0.582  | 0.7     | 0.92, 1.17  |
|          | Metro            | 1.34                                            | 0.551  | 0.5     | 0.59, 3.00  |
|          | Parent Education | overall test chi <sup>2</sup> 2.18(2) p=0.337   |        |         |             |
|          | - some tertiary  | 1.64                                            | 0.831  | 0.333   | 0.60, 4.43  |
|          | - university     | 1.99                                            | 0.953  | 0.149   | 0.78, 5.09  |
|          | Other Language   | 2.49                                            | 1.121  | 0.043*  | 1.03, 6.02  |
|          | Scald            | 2.29                                            | 0.851  | 0.26*   | 1.11, 4.75  |
|          | Contact          | 0.51                                            | 0.209  | 0.102** | 0.23, 1.14  |
|          | Flame            | 0.60                                            | 0.221  | 0.166** | 0.29, 1.24  |
|          | TBSA             | 1.07                                            | 0.117  | 0.6     | 0.86, 0.32  |
|          | Predictor 1      | 0.89                                            | 0.406  | 0.8     | 0.36, 2.17  |
|          | Predictor 2      | 4.49                                            | 2.392  | 0.005*  | 1.58, 12.75 |
|          | Predictor 3      | 0.36                                            | 0.188  | 0.050*  | 0.13, 1.00  |
|          | Predictor 4      | 1.28                                            | 0.834  | 0.7     | 0.36, 4.59  |
| 12m IESR | Female           | 2.41                                            | 1.207  | 0.079** | 0.90, 6.43  |
|          | Age              | 1.04                                            | 0.066  | 0.6     | 0.92, 1.17  |
|          | Metro            | 2.67                                            | 1.557  | 0.093** | 0.85, 8.38  |
|          | Other Language   | 3.41                                            | 1.599  | 0.009*  | 1.36, 8.55  |
|          | Parent Education | overall test chi <sup>2</sup> 15.20(2) p=0.0005 |        |         |             |
|          | - some tertiary  | 8.87                                            | 6.649  | 0.004   | 2.04, 38.54 |
|          | - university     | 16.75                                           | 12.159 | <0.0001 | 1.04, 69.49 |
|          | Scald            | 3.76                                            | 1.75   | 0.004*  | 1.51, 9.36  |
|          | Contact          | 0.35                                            | 0.156  | 0.019*  | 0.15, 0.84  |
|          | Flame            | -                                               | -      | -       | -           |
|          | TBSA             | 1.24                                            | 0.223  | 0.240   | 0.87, 1.76  |
|          | Predictor 1      | 0.54                                            | 0.241  | 0.165** | 0.22, 1.29  |
|          | Predictor 2      | 6.05                                            | 3.192  | 0.001*  | 2.15, 17.02 |
|          | Predictor 3      | 0.07                                            | 0.057  | 0.001*  | 0.02, 0.33  |
|          | Predictor 4      | 2.05                                            | 1.177  | 0.212   | 0.66, 6.32  |
